# Supplementary material for: Cerebral blood flow and cerebrovascular reactivity are preserved in a mouse model of cerebral microvascular amyloidosis
Source: eLife. 2021 Feb 12;10:e61279. doi: 10.7554/eLife.61279 (PMC7880694; doi:10.7554/eLife.61279)
Supplement: Supplementary file 1. — The tests are grouped per effect measured, that is, genotype effects on tab 1, age effects on tab 2, anesthesia effects on tab 3, and CO2 effects on tab 4. Tests that returned significant effects are highlighted in green. [file elife-61279-supp1.xlsx]

## Sheet: Genotype_effect
CBF full mid-brain WT vs Tg-SwDI			CVR full mid-brain WT vs Tg-SwDI			ATT full mid-brain WT vs Tg-SwDI
age (months)	Mann Whitney U test, p-value		age (months)	Mann Whitney U test, p-value		State	Mann Whitney U test, p-value
3	0.139		3	0.963		Baseline	0.681
6	0.815		6	0.963		with CO2	0.758
9	0.37		9	0.321
12	1		12	1
12.3	0.47		12.3	0.47
CBF cortex WT vs Tg-SwDI			CVR cortex WT vs Tg-SwDI
age (months)	Mann Whitney U test, p-value		age (months)	Mann Whitney U test, p-value
3	0.888		3	0.606
6	0.963		6	0.743
9	0.743		9	0.815
12	0.918		12	0.837
CBF thalamus WT vs Tg-SwDI			CVR thalamus WT vs Tg-SwDI
age (months)	Mann Whitney U test, p-value		age (months)	Mann Whitney U test, p-value
3	0.093		3	0.815
6	0.423		6	0.743
9	0.236		9	0.093
12	1		12	0.758
Inversion efficiency WT vs Tg-SwDI
age (months)	Mann Whitney U test, p-value
3	0.442
6	0.743
9	0.743
12	0.681
Bodyweight WT vs Tg-SwDI			Brain Volume WT vs Tg-SwDI
age (months)	Mann Whitney U test, p-value		age (months)	Mann Whitney U test, p-value
3	0.114		3	0.37
4	0.423		6	0.743
5	0.2		9	0.815
6	0.541		12	0.606
7	0.321
8	0.481
9	0.37
10	0.299
11	0.252
12	0.408

## Sheet: Age_effect
CBF (full mid-brain) general age effect				CBF (cortex) general age effect			CBF (thalamus) general age effect
Genotype	Friedman test, p-value			Genotype	Friedman test, p-value		Genotype	Friedman test, p-value
WT	0.005			WT	0.435		WT	0.002
Tg-SwDI	0.037			Tg-SwDI	0.478		Tg-SwDI	0.04
CBF (full mid-brain) post hoc tests				CVR (cortex) general age effect			CBF (thalamus) post hoc tests
	Wilcoxon test, p-value			Genotype	Friedman test, p-value			Wilcoxon test, p-value
WT 3 vs 6 months	0.008			WT	0.865		WT 3 vs 6 months	0.008
WT 6 vs 9 months	0.374			Tg-SwDI	0.134		WT 6 vs 9 months	0.374
WT 9 vs 12 months	0.678						WT 9 vs 12 months	0.953
Tg-SwDI 3 vs 6 months	0.036						Tg-SwDI 3 vs 6 months	0.05
Tg-SwDI 6 vs 9 months	1						Tg-SwDI 6 vs 9 months	0.889
Tg-SwDI 9 vs 12 months	0.735						Tg-SwDI 9 vs 12 months	0.612
CVR (full mid-brain) general age effect							CVR (thalamus) general age effect
Genotype	Friedman test, p-value						Genotype	Friedman test, p-value
WT	0.04						WT	0.04
Tg-SwDI	0.074						Tg-SwDI	0.054
CVR (full mid-brain) post-hoc tests							CVR (thalamus) post-hoc tests
	post-hoc Wilcoxon test, p-value							post-hoc Wilcoxon test, p-value
WT 3 vs 6 months	0.038						WT 3 vs 6 months	0.008
WT 6 vs 9 months	0.515						WT 6 vs 9 months	0.678
WT 9 vs 12 months	0.859						WT 9 vs 12 months	0.859

## Sheet: Anesthesia_effect
CBF (full mid-brain) isoflurane vs U&A
Genotype	Wilcoxon test, p-value
WT	0.008
Tg-SwDI	0.018
CVR (full mid-brain) isoflurane vs U&A
Genotype	Wilcoxon test, p-value
WT	0.008
Tg-SwDI	0.018
pCO2 increase isoflurane vs U&A
Genotype	Wilcoxon test, p-value
WT	0.028
Tg-SwDI	0.018

## Sheet: CO2effect
ATT (full mid-brain) baseline vs CO2
genotype	Mann Whitney U, p-value
WT	0.066
Tg	0.028
